# Supplementary material for: Evaluation of the LFA-REAL clinician-reported outcome (ClinRO) and patient-reported outcome (PRO): prespecified analysis of the phase III ustekinumab trial in patients with SLE
Source: HighWire-hosted journal article supplement (doi:10.1136/lupus-2022-000875), 2023-04-01

**Supplemental Table 1. Summary of Key Baseline Demographic and Disease Characteristics**

| <b>All Randomized Subjects</b>                            | <b>N=516</b>         |
|-----------------------------------------------------------|----------------------|
| Female, %                                                 | 93.4                 |
| Age, mean $\pm$ SD                                        | 43.5 $\pm$ 8.9       |
| Race, %                                                   |                      |
| White                                                     | 66.7                 |
| African American                                          | 8.1                  |
| Asian                                                     | 20.0                 |
| Disease duration, mean $\pm$ SD                           | 8.9 $\pm$ 7.8        |
| SLEDAI-2K (0-105), mean $\pm$ SD                          | 10.4 $\pm$ 3.5       |
| PGA (VAS 0-3), mean $\pm$ SD                              | 1.8 $\pm$ 0.4        |
| BILAG, %                                                  |                      |
| $\geq$ 1A                                                 | 43.2                 |
| $\geq$ 2B                                                 | 57.0                 |
| Tender Joint Count, mean $\pm$ SD                         | 14.6 $\pm$ 11.0      |
| Swollen Joint Count, mean $\pm$ SD                        | 8.8 $\pm$ 6.6        |
| Joints with Both Tenderness & Inflammation, mean $\pm$ SD | 8.3 $\pm$ 6.3        |
| CLASI activity score (0-70), mean $\pm$ SD                | 8.2 $\pm$ 6.6        |
| Anti-dsDNA Antibodies Positive ( $>$ 75 kIU/L), %         | 36.8                 |
| Low Complement Present, %                                 |                      |
| C3                                                        | 42.4                 |
| C4                                                        | 26.4                 |
| Patients with lupus nephritis, %                          | 19.4                 |
| Concomitant Medications, % (mean $\pm$ SD dose, mg/day)   |                      |
| Oral glucocorticoids, % (mean $\pm$ SD dose, mg/day)      | 79.8 (9.7 $\pm$ 5.1) |
| Antimalarials, %                                          | 73.3                 |

**Supplemental Table 2a.** Number of patients included in the correlations between LFA-REAL ClinRO and SLE disease activity measures, LFA-REAL PRO and other PRO measures, PGA with SLEDAI and BILAG at baseline, 24 and 52 weeks

|           | LFA-REAL ClinRO |            |            |                   | LFA-REAL PRO at visit |            |            |           | PGA      |            |            |
|-----------|-----------------|------------|------------|-------------------|-----------------------|------------|------------|-----------|----------|------------|------------|
|           | Baseline        | Week<br>24 | Week<br>52 |                   | Baseline              | Week<br>24 | Week<br>52 |           | Baseline | Week<br>24 | Week<br>52 |
| PGA       | 494             | 449        | 248        | FACIT-F           | 114                   | 117        | 77         | BILAG     | 498      | 440        | 244        |
| BILAG     | 480             | 443        | 248        | Lupus QoL         | 114                   | 117        | 77         | SLEDAI 2K | 512      | 425        | 237        |
| SLEDAI-2K | 494             | 449        | 248        | SF-36 v2 Vitality | 114                   | 117        | 77         |           |          |            |            |
|           |                 |            |            | SF-36 PCS         | 114                   | 117        | 77         |           |          |            |            |

LFA-REAL ClinRO, Lupus Foundation of America Rapid Evaluation of Activity in Lupus Clinician Reported Outcome; LFA-REAL PRO, Lupus Foundation of America Rapid Evaluation of Activity in Lupus Patient Reported Outcome; SLEDAI-2K, Systemic Lupus Erythematosus Disease Activity Index 2000; BILAG, British Isles Lupus Assessment Group 2004 Index Total Score; PGA, Physician Global Assessment. LFA-REAL PRO, Lupus Foundation of America Rapid Evaluation of Activity in Lupus Patient Reported Outcome; SF-36, Short-Form Health Survey; SF-36 PCS, SF-36 Physical Component Summary; Lupus QoL, Lupus Quality of Life questionnaire; FACIT-F, Functional Assessment of Chronic Illness Therapy Fatigue Scale. SLEDAI-2K, Systemic Lupus Erythematosus Disease Activity Index 2000; BILAG Index Total, British Isles Lupus Assessment Group 2004 Index Total Score; PGA, Physician Global Assessment.

**Supplemental Table 2b.** Number of patients included in the correlations between LFA REAL ClinRO Total Score from baseline and composite response measures/disease activity measures, and LFA-REAL PRO change from baseline with other PROs at 24 and 52 weeks

|                 | LFA-REAL ClinRO Change from Baseline |         |                  | LFA-REAL PRO change from baseline |         |
|-----------------|--------------------------------------|---------|------------------|-----------------------------------|---------|
|                 | Week 24                              | Week 52 |                  | Week 24                           | Week 52 |
| DORIS Remission | 441                                  | 242     | FACIT-F          | 106                               | 70      |
| LLDAS           | 416                                  | 231     | Lupus QoL        | 106                               | 70      |
| BICLA Response  | 435                                  | 239     | SF-36v2 Vitality | 106                               | 70      |
| SRI-4 Response  | 417                                  | 232     | SF36-PCS         | 106                               | 70      |
| PGA             | 442                                  | 242     |                  |                                   |         |
| BILAG           | 436                                  | 241     |                  |                                   |         |
| SLEDAI-2K       | 419                                  | 234     |                  |                                   |         |

LFA-REAL ClinRO, Lupus Foundation of America Rapid Evaluation of Activity in Lupus Clinician Reported Outcomes; LFA-REAL PRO, Lupus Foundation of America Rapid Evaluation of Activity in Lupus Patient Reported Outcomes; SLEDAI-2K, Systemic Lupus Erythematosus Disease Activity Index 2000; BILAG, British Isles Lupus Assessment Group 2004 Index Total Score; PGA, Physician Global Assessment; SRI-4, SLEDAI-2K SLE Responder Index; BICLA, BILAG-based Composite Lupus Assessment; LLDAS, Lupus Low Disease Activity State; DORIS Remission, Clinical Remission on Treatment; SF-36, Short-Form Health Survey; SF-36 PCS, SF-36 Physician Component Summary; Lupus QoL, Lupus Quality of Life questionnaire; FACIT-F, Functional Assessment of Chronic Illness Therapy Fatigue Scale.

**Supplemental Table 2c.** Number of patients included in correlations between LFA-REAL ClinRO and PRO Scores, ClinRO Rash and PRO Rash, ClinRO alopecia and PRO Hair Loss, ClinRO Arthralgia/Arthritis and PRO Overall Arthritis at Baseline, Week 24 and Week 52 visits as well as Change from Baseline to Week 24 and Week 52.

|                                                    | At Visit |         |         | Change from baseline |         |
|----------------------------------------------------|----------|---------|---------|----------------------|---------|
|                                                    | Baseline | Week 24 | Week 52 | Week 24              | Week 52 |
| ClinRO arthralgia/arthritis/ PRO overall Arthritis | 114      | 116     | 77      | 105                  | 70      |
| ClinRO Alopecia and PRO Hair Loss                  | 114      | 116     | 77      | 105                  | 70      |
| ClinRO Rash and PRO Rash                           | 114      | 116     | 77      | 105                  | 70      |
| ClinRO Total and PRO Total                         | 114      | 116     | 77      | 105                  | 70      |

LFA-REAL ClinRO, Lupus Foundation of America Rapid Evaluation of Activity in Lupus Clinician Reported Outcomes; LFA-REAL PRO, Lupus Foundation of America Rapid Evaluation of Activity in Lupus Patient Reported Outcomes

**Supplemental Table 2d.** Number of patients included in correlation between LFA REAL ClinRO PRO Musculoskeletal and Mucocutaneous Components and individual components of disease activity measures

|                                                      | LFA-REAL ClinRO:<br>Arthralgia/arthritis |         |         | LFA-REAL PRO symptoms of arthritis:<br>Overall Arthritis |         |         |
|------------------------------------------------------|------------------------------------------|---------|---------|----------------------------------------------------------|---------|---------|
|                                                      | Baseline                                 | Week 24 | Week 52 | Baseline                                                 | Week 24 | Week 52 |
| SLEDAI Arthritis                                     | 494                                      | 452     | 252     | 114                                                      | 116     | 77      |
| Subset: Subjects with >= 8 Active Counts At Baseline | 220                                      | 202     | 118     | 71                                                       | 70      | 48      |
| Subset: Subjects with >= 4 Active Counts At Baseline | 413                                      | 380     | 216     | 102                                                      | 102     | 67      |
| All Subjects Active Joint Count                      | 494                                      | 451     | 248     | 114                                                      | 116     | 76      |

  

|                                                  | LFA-REAL ClinRO |         |         |                                | LFA-REAL PRO |         |         |
|--------------------------------------------------|-----------------|---------|---------|--------------------------------|--------------|---------|---------|
|                                                  | Baseline        | Week 24 | Week 52 |                                | Baseline     | Week 24 | Week 52 |
| ClinRO Mucosal Ulcers/SLEDAI Mucosal Ulcers      | 494             | 454     | 252     | NA                             | NA           | NA      |         |
| ClinRO Alopecia/SLEDAI Alopecia                  | 494             | 454     | 252     | PRO Hair Loss/SLEDAI Alopecia  | 114          | 117     | 77      |
| ClinRO Rash/SLEDAI Rash                          | 494             | 454     | 252     | PRO Rash/ SLEDAI Rash          | 114          | 117     | 77      |
| ClinRO Mucocutaneous Global/BILAG Mucocutaneous  | 494             | 454     | 252     | PRO Rash/BILAG mucocutaneous   | 114          | 117     | 77      |
| ClinRO Mucocutaneous Global/CLASI Total Activity | 489             | 452     | 250     | PRO Rash/ CLASI Total activity | 114          | 117     | 77      |

LFA-REAL ClinRO, Lupus Foundation of America Rapid Evaluation of Activity in Lupus Clinician Reported Outcomes; LFA-REAL PRO, Lupus Foundation of America Rapid Evaluation of Activity in Lupus Patient Reported Outcomes; CLASI, Cutaneous Lupus Erythematosus Disease Area and Severity Index is a measure of skin-disease severity, with scores ranging from 0 (least severe) to 70 (most severe).

Active Joint Counts (62 joints) are defined as joints with pain and signs of inflammation. Tender (Pain) Joint count (64 Joints) are defined as joints with pain on examination.

Lupus Foundation of America Rapid Evaluation of Activity in Lupus Patient Reported Outcomes (LFA-REAL PRO) Symptoms of Arthritis consist of 3 individual symptom domains each scored on 0-100 mm Visual Analogue Scale (VAS). Overall Arthritis is a 0-100 mm VAS indicating patient's global consideration of Joint pain, Swelling and Stiffness. LFA-REAL ClinRO Mucocutaneous Global is a 0-100 mm VAS as an overall consideration of 3 Mucocutaneous domains: Rash, Alopecia, Mucosal.

**Supplemental Table 3a.** Summary of Area Under the Curve (AUC) for LFA-REAL ClinRO Score Change from Baseline In Discrimination of Disease Measure Responses: SRI-4, Composite SRI-4, BICLA; Presenting N and AUC (95% CI) For Pooled (Combined) Treatments

| AUC (95% CI) for<br>LFA-REAL ClinRO Score in<br>Discrimination of: | Change from Baseline       |                            |
|--------------------------------------------------------------------|----------------------------|----------------------------|
|                                                                    | Week 24                    | Week 52                    |
| SRI-4 Response                                                     | N=417<br>0.76 (0.71, 0.80) | N=232<br>0.76 (0.70, 0.83) |
| Composite SRI-4 Response                                           | -                          | N=245<br>0.72 (0.66, 0.79) |
| BICLA Response                                                     | N=435<br>0.70 (0.65, 0.75) | N=239<br>0.70 (0.64, 0.77) |

Area under the curve (AUC) is in terms of LFA-REAL ClinRO Score change from baseline in discrimination of the noted Response (SRI-4, Composite SRI-4, or BICLA). Estimates are based on a logistic regression model for Response (Yes) with LFA-REAL ClinRO Score change from baseline as the single covariate. 95% confidence intervals are in terms of the Wald method.

**Supplemental Table 3b.** Sensitivity and Specificity of LFA-REAL ClinRO Score Change from Baseline at Week 52 In Discrimination of SRI-4 Response; Presenting Six Cut-Points

| Cut-Point Selection Method:<br>Either "Of Clinical Interest" or Through Use of Optimal |           |             |             |
|----------------------------------------------------------------------------------------|-----------|-------------|-------------|
| Cut-Point Estimation                                                                   | Cut-Point | Sensitivity | Specificity |
| <i>Of Clinical Interest</i>                                                            | -60       | 0.69        | 0.70        |
| Sensitivity, Specificity Equality                                                      | -59       | 0.69        | 0.70        |
| Closest Distance to ROC "Ideal Point"                                                  | -55       | 0.75        | 0.68        |
| <i>Of Clinical Interest</i>                                                            | -50       | 0.79        | 0.61        |
| Youden Index                                                                           | -41       | 0.86        | 0.58        |
| <i>Of Clinical Interest</i>                                                            | -40       | 0.88        | 0.54        |

The six cut-points within this table are selected as follows. Three cut-points are of general clinical interest: -60, -50, -40. In addition, 3 standard methods are used to estimate an optimal cut-point and, for these data, include: -59, -55, and -41. The 3 methods are described throughout literature and not expanded here.

**Supplemental Table 3c.** Sensitivity and Specificity of LFA-REAL ClinRO Score Change from Baseline at Week 52 In Discrimination of BICLA Response; Presenting Six Cut-Points

| <b>Cut-Point Selection Method:</b>                     |                  |                    |                    |
|--------------------------------------------------------|------------------|--------------------|--------------------|
| <b>Either "Of Clinical Interest" or Through Use of</b> |                  |                    |                    |
| <b>Optimal Cut-Point Estimation</b>                    | <b>Cut-Point</b> | <b>Sensitivity</b> | <b>Specificity</b> |
| <i>Of Clinical Interest</i>                            | -68              | 0.64               | 0.64               |
| Sensitivity, Specificity Equality                      | -60              | 0.69               | 0.57               |
| Closest Distance to ROC "Ideal Point"                  | -58              | 0.76               | 0.57               |
| <i>Of Clinical Interest</i>                            | -50              | 0.83               | 0.49               |
| Youden Index                                           | -43              | 0.90               | 0.44               |
| <i>Of Clinical Interest</i>                            | -40              | 0.90               | 0.39               |

The six cut-points within this table are selected as follows. Three cut-points are of general clinical interest: -60, -50, -40. In addition, 3 standard methods are used to estimate an optimal cut-point and, for these data, include: -59, -55, and -41. The 3 methods are described throughout literature and not expanded here.



**Supplemental Figure 4a.** Area Under the Curve (AUC) for LFA-REAL ClinRO Score Change from Baseline at Week 52 In Discrimination of SRI-4

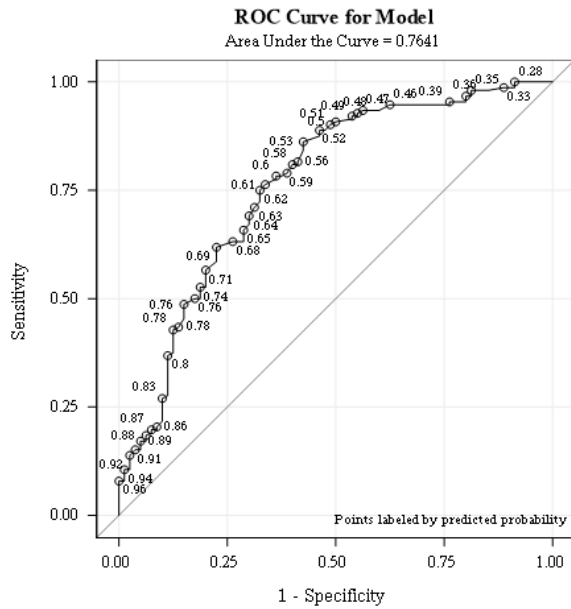

**Supplemental Figure 4b.** Area Under the Curve (AUC) for LFA-REAL ClinRO Score Change from Baseline at Week 52 In Discrimination of BICLA

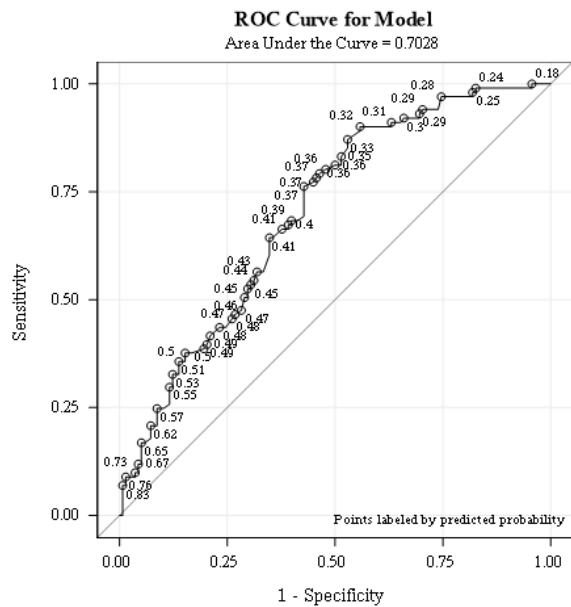

Supplement: lupus-2022-000875supp001_data_supplement.pdf [file lupus-2022-000875supp001_data_supplement.pdf]
